1     **Identification and functional characterization of two novel mutations in *KCNJ10* and *PI4KB***  
2                                     **in SeSAME syndrome without electrolyte imbalance**

3     Ravi K Nadella<sup>1</sup>, Anirudh Chellappa<sup>1</sup>, Anand G Subramaniam<sup>1</sup>, Ravi Prabhakar More<sup>6</sup>, Srividya  
4     Shetty<sup>1</sup>, Suriya Prakash<sup>1</sup>, Nikhil Ratna<sup>1</sup>, Vandana VP<sup>5</sup>, Meera Purushottam<sup>1</sup>, Jitender Saini<sup>4</sup>, Biju  
5     Viswanath<sup>1</sup>, PS Bindu<sup>2</sup>, Madhu Nagappa<sup>2</sup>, Bhupesh Mehta<sup>3</sup>, Sanjeev Jain<sup>1,6</sup>, Ramakrishnan  
6     Kannan<sup>1#</sup>

7

8     # Corresponding author

9

10    **Affiliations**

11    <sup>1</sup>Department of Psychiatry; <sup>2</sup>Department of Neurology; <sup>3</sup>Department of Biophysics; <sup>4</sup>Department of  
12    Neuroimaging and Interventional radiology; <sup>5</sup>Department of Speech Pathology and Audiology at  
13    National Institute of Mental Health and Neurosciences, Bangalore, India.

14    <sup>6</sup>National Centre for Biological Sciences, Tata Institute for Fundamental Research, Bangalore, India

15    **Address for correspondence**

16    Dr. Ramakrishnan Kannan, PhD

17    National Institute of Mental Health and Neurosciences (NIMHANS)

18    Bengaluru, Karnataka, India PIN: 560029

19    Phone: 091-80-26995791

20    Fax:+91-80-26564830

21    Email: [kannan@nimhans.edu.in](mailto:kannan@nimhans.edu.in)

22    ORCID #: [0000-0001-7717-0516](https://orcid.org/0000-0001-7717-0516)



## 24 **Abstract**

25 Dysfunction in inwardly-rectifying potassium channel Kir4.1 has been implicated in SeSAME  
26 syndrome, an autosomal-recessive (AR), rare, multi-systemic disorder. However, not all  
27 neurological, intellectual disability and comorbid phenotypes in SeSAME syndrome can be  
28 mechanistically linked solely to Kir4.1 dysfunction. We therefore performed whole exome  
29 sequencing and identified additional genetic risk-elements that might exert causative effects either  
30 alone or in concert with Kir4.1 in a family diagnosed with SeSAME syndrome. Two variant  
31 prioritization pipelines based on AR inheritance and runs of homozygosity (ROH), identified two  
32 novel homozygous variants in *KCNJ10* and *PI4KB* and five rare homozygous variants in *PVRL4*,  
33 *RORC*, *FLG2*, *FCRL1*, *NIT1* and one common homozygous variant in *HSPA6* segregating in all  
34 four patients. The novel mutation in *KCNJ10* resides in the cytoplasmic domain of Kir4.1, a seat of  
35 phosphatidyl inositol bisphosphate (PIP2) binding. The mutation altered the subcellular localization  
36 and stability of Kir4.1 in patient-specific lymphoblastoid cells (LCLs) compared to parental  
37 controls. Barium-sensitive endogenous K<sup>+</sup> currents in patient-specific LCLs using whole-cell patch  
38 clamp electrophysiology revealed membrane depolarization and defects in inward K<sup>+</sup> ion  
39 conductance across the membrane, thereby suggesting a loss-of-function effect of *KCNJ10* variant.  
40 Altogether our findings implicate the role of new genes in SeSAME syndrome without electrolyte  
41 imbalance and thereby speculate the regulation of Kir4.1 channel activity by PIP2 and integrin-  
42 mediated adhesion signaling mechanisms.

43

## 44 **Introduction**

45 Channelopathies are a heterogeneous group of disorders resulting in dysfunction of ion channels.  
46 They disrupt the brain function resulting in seizures and developmental delay [1, 2, 3, 4, 5, 6, 7, 8].  
47 The cells of central and peripheral nervous system contain a plethora of ion channel proteins which  
48 interact with multiple signaling pathways linking channel physiology to neuronal differentiation,  
49 axonal integrity and cell migration [6, 7, 9, 10]. Nevertheless, not all phenotypes manifested in a  
50 syndromic disorder can be attributed to monogenic variants in membrane ion channels [11].  
51 Therefore, for a complete molecular understanding of channelopathies, it is imperative to focus on  
52 other classes of risk-associated rare variants especially in minor genes which modifies the effect of  
53 major gene mutations. Such an approach for SeSAME syndrome, a rare autosomal recessive,  
54 multisystemic neuropsychiatric illness has not been addressed and will greatly benefit to understand  
55 the aetiology of Kir4.1 channel dysfunction that will ultimately inform treatment.

56 SeSAME syndrome (OMIM#612780), characterized by **Seizures**, **Sensorineural deafness**, **Ataxia**,  
57 **Mental retardation** and **Electrolyte imbalance**, otherwise known as EAST (**Epilepsy**, **Ataxia**,  
58 **Sensorineural deafness**, **Tubulopathy**) syndrome is predominantly caused by homozygous or  
59 compound heterozygous mutations in *KCNJ10* gene [12, 13] encoding Kir4.1, an inwardly  
60 rectifying potassium channel. Till date, 21 mutations from 27 patients have been reported, of which  
61 11 were from consanguineous unions [14]. Dysfunction of Kir4.1 has been associated with other  
62 neurodegenerative conditions like idiopathic epilepsy [15], autism spectrum disorder with seizures  
63 [16, 17], Huntington's disease [18], multiple sclerosis [19] and Rett syndrome [20]. Several  
64 modern-day mammals like Jack Russell Terriers, Belgian Shepherd dogs [21] and Malinois dogs  
65 [22] experienced SeSAME-like phenotype with *KCNJ10* mutations.

66 Kir 4.1 channels display greater inward  $K^+$  flow at negative resting membrane potential to  
67 equilibrium potential for  $K^+$  ( $E_k$ ), while at more positive membrane potentials, outward flow of  $K^+$   
68 is inhibited by intracellular  $Mg^{2+}$  and polyamines [23]. Depending on tissue localization and  
69 assembly of Kir4.1 subunit, these channels exhibit distinctive physiological properties [24]. Kir4.1  
70 channel play conspicuous roles in a spectrum of biological contexts like maintenance of resting  
71 membrane potential [25], facilitation of glutamate uptake [26], potassium siphoning by glial cells  
72 [27, 28], cell volume and peak strength regulation of motor neurons [10], axonal integrity through  
73 myelination by oligodendrocytes [6, 7, 29] and cell migration [9]. How Kir4.1 drives specific  
74 downstream signaling during disease manifestation in SeSAME syndrome requires us to understand  
75 the plethora of modifiers. Moreover, the activation of Kir4.1 depend inherently on factors like  
76 cellular milieu, presence of auxiliary subunits and formation of subunits for heterooligomeric  
77 assembly in cell type of choice [27]. To address these issues and to identify other genetic  
78 associative elements with *KCNJ10*-mediated SeSAME pathogenesis, we performed whole exome  
79 sequencing and functional characterization of pathogenic *KCNJ10* variant in patient-specific  
80 lymphoblastoid cells which harbours the spectrum of risk variants.

81  
82 Whole exome sequencing analysis of four patients and two unaffected parents identified a novel  
83 missense mutation in *KCNJ10*, a candidate gene in SeSAME syndrome. In addition, using two  
84 independent variant prioritization pipelines, we isolated variants in other minor genes which are  
85 known to be involved in pathways that regulate Kir4.1 signaling in different biological contexts.  
86 Along with *KCNJ10*, our pipeline also identified novel variants in the following genes; *PIK4B*  
87 (PIP2 signaling), *PVRL4* (cell adhesion signaling), *HSPA6* (ER-protein trafficking) and *NIT1*  
88 (apoptosis). Finally, we validated the impact of *KCNJ10* variant in inward-rectification of  $K^+$

89 current using patient-specific LCLs. The variant is localized in a stretch of conserved residues  
90 required for PIP2 binding which is juxtaposed at the junction of transmembrane and cytoplasmic  
91 domain. Functionally, the variant alters its protein localization, accumulates in the cytoplasm,  
92 depolarizes the membranes and inhibits inward-rectification of K<sup>+</sup> currents in patient LCLs.

93

## 94 **Materials and Methods**

### 95 **Patient recruitment, genomic DNA isolation and generation of lymphoblastoid cells**

96 Blood samples collected from ten participants [unaffected parents, (n=4), and affected off springs,  
97 (n=6)]after receipt of informed consent were recruited at the National Institute of Mental Health and  
98 Neurosciences under aseptic conditions following guidelines established by Institutional Human  
99 Ethics Committee (IHEC) and Institutional Stem Cell committee (ISCC). The participants were  
100 referred for biochemical evaluation and selected for further analysis by presence of clinical features  
101 like seizures, ataxia, mental retardation, hearing impairment. Genomic DNA was isolated from  
102 blood samples of all participants using NucleoSpin<sup>®</sup> Blood L (Macherey-Nagel GmbH & Co. KG)  
103 for whole exome sequencing (WES). Peripheral blood mononuclear cells (PBMNCs) was isolated  
104 from whole blood of ten individuals and transformed by Epstein Barr virus (EBV) using standard  
105 protocol [30] to generate lymphoblastoid cell lines (LCLs). The six LCLs suspensions were  
106 cultured in medium supplemented with RPMI-1640 (HiMedia AL060A), 20% fetal bovine serum  
107 (Thermo Fisher Scientific 16000-044), 1% penicillin/streptomycin (Thermo Fisher Scientific  
108 15140-122) and maintained at 37°C with 5 % CO<sub>2</sub> in a humidified atmosphere. The LCLs were  
109 further screened for karyotype abnormalities using G- banding approach and sample identity  
110 confirmation was done by STR profiling [GenePrint<sup>®</sup> 10 System (Promega)].

111

## 112 **Whole exome sequencing, variant calling, quality check and annotation**

113 DNA library was prepared using Nextera Rapid Capture and Expanded Exome Kits. The library  
114 was further subjected to WES, performed on Illumina Hi-Sequencer to generate pair-end reads  
115 (150bp\*2). We followed whole exome sequence analysis pipeline used by [31]. FastQC (v0.11.5)  
116 (<http://www.bioinformatics.babraham.ac.uk/projects/fastqc>) was used for the quality of raw reads,  
117 which examine per base and per sequence quality scores, per base and per sequence GC content, per  
118 base N content and sequence length distribution. Prinseq-lite-0.20.4 tool was used to trim poor  
119 quality region (<http://prinseq.sourceforge.net/>) and adapterremoval-2.1.7 was used to remove  
120 adapter contamination in raw reads. Filtered reads with a quality score (Q)>20 were aligned to the  
121 human reference genome hg19 (GRCh37) using BWA (v0.5.9). SAM to BAM conversion and  
122 sorting were done with Samtools 1.3 tool  
123 (<https://sourceforge.net/projects/samtools/files/samtools/1.3/>). Then the PCR duplicates were  
124 removed using PICARD tools (v1.96) (<https://broadinstitute.github.io/picard/>) and the INDELS  
125 were realigned using GATK (v3.6). The BAM alignment was subjected to QC using Qualimap  
126 (v2.2). VarScan (v2.3.9) (Coverage=8, MAF>=0.25,  $p$ -value<0.001) was used to call for SNPs and  
127 INDELS. The quality of VCF file was checked using RTG tools 3.7.1  
128 (<https://github.com/RealTimeGenomics/rtg-tools/releases>). All samples annotation was performed  
129 using ANNOVAR tool. Population controls (n=7) representing three religiousgroups (Group A, B,  
130 and C) matched for age, sex and ethnicity, were obtained from INDEX-db [32]. All controls passed  
131 the age of risk i.e., 45 years, for neuropsychiatric illnesses, except for the outbred Parsi (religious  
132 group 3) individual (age=26), who was included as an outlier. All the controls were of southern  
133 Indian ethnic origin except for the Parsi. To validate *KCNJ10* variant identified by whole exome

134 sequencing, we performed Sanger validation using the following gene specific primers: Forward  
135 (CATTCGTTTCAGCCAGCATGC) and Reverse (TCAGACATTGCTGATGCGCA).

136

### 137 **Assessing runs of homozygosity (ROH)**

138 Exome-wide F-statistics was calculated using the --het option in *vcftools* (v0.1.5), for every sample  
139 to investigate whether levels of heterozygosity differed between the affected siblings, unaffected  
140 parents and population controls. Runs of homozygosity (ROH) was detected in all samples using --  
141 homozyg option in PLINK (v1.9) [33]. The minimum length for a tract to qualify as ROH was set  
142 to 500kb and the minimum number of variants constituting an ROH was set to 100. A maximum of  
143 3 intervening heterozygous variants were allowed within a ROH window. ROH density was set to  
144 default i.e., an ROH must have at least one variant per 50kb, on an average. The centromeric, X, Y  
145 and mitochondrial variants were ignored during this analysis. The stretches that were shared  
146 between all the affected individuals but not observed in either of the parents or the population  
147 controls were thus notified as ROH<sub>affected</sub>, which were identified by using a combination of *intersect*  
148 and *subtract* functions in *bedtools* (v2.22). The variants were annotated using variant effect  
149 predictor (VEP GRCh37).

150

### 151 **Whole-cell patch clamp electrophysiology**

152 For electrophysiology studies, LCLs from a healthy wild type control, six participants from  
153 SeSAME like family described in this study were used. The LCLs were dissociated to single cells  
154 and plated on glass cover slips coated with poly-D-lysine (Millipore, A003M EMD) and incubated  
155 for half an hour at 37°C with 5% CO<sub>2</sub> in a humidified atmosphere before recordings. Whole cell  
156 patch clamp recordings were configured following which the membrane potential (Vm) of LCLs



157 was measured. A pulse protocol was applied with  $V_m$  held at resting membrane potential and then  
158 stepped to test potentials between -120mV to 40mV in 10mV steps for 140ms. A single electrode  
159 was used to measure membrane current (nA) by whole cell patch clamp technique. Intracellular  
160 voltage-clamp recordings and positioning of perfusion micropipette were done using two Narashige  
161 hydraulic micromanipulators (MNW-203, Narashige Japan). Recording pipettes (tip resistance 4-  
162 6M $\Omega$ ) were filled with intracellular solution containing 120mM potassium D-gluconate (G4500,  
163 Sigma), 1mM MgCl<sub>2</sub>, 15mM KCl, 1mM CaCl<sub>2</sub>, 10mM EGTA, 10mM HEPES (pH 7.2). After  
164 obtaining whole-cell mode, access resistance was 10-15 M $\Omega$ . The extracellular recording solution  
165 contained 130mM NaCl<sub>2</sub>, 3mM CaCl<sub>2</sub>, 2.5mM MgCl<sub>2</sub>, 15mM HEPES (pH 7.4). In experiments,  
166 where LCLs were perfused with high extracellular K<sup>+</sup>, concentration of KCl varied from 5-20 mM  
167 while that of NaCl was decreased to 110mM to adjust osmolarity. Recordings in LCLs were  
168 performed using an HEKA triple patch clamp amplifiers (EPC 10 USB) at room temperature (RT).  
169 To determine specificity of Kir4.1 current, 110 $\mu$ m/L BaCl<sub>2</sub> was used and to block endogenous Cl<sup>-</sup>  
170 currents, 150 $\mu$ m/L niflumic acid was used in the bath solution. The pClamp 9 (Axon Instruments)  
171 software package was used for data acquisition and analysis. For statistical analysis we used  
172 GraphPad Prism (San Diego, USA). To chose between parametric or non-parametric tests for  
173 normality criteria, Shapiro-Wilk estimator was used. For data sets with small N, non-parametric test  
174 was used to avoid possible type II errors. Mean differences were statistically evaluated using  
175 ANOVA with Levene's homogeneity of variances test and pairwise comparisons were made using  
176 Turkey adjustment. Non-parametric  $k$  independent Kruskal-Wallis test was applied with Bonferroni  
177 correction to compare the differences among means. Error bars represent  $\pm$ S.E.

178

179 **Immunofluorescence and western blotting**

180 The LCLs were fixed using 4% paraformaldehyde (Sigma, PFA: P6148) in phosphate buffered  
181 saline (PBS) for 20 min at RT. Cells were permeabilized using 0.2 % Triton X-100 (Sigma, T8787)  
182 for 10 min and were washed twice with PBS. Following permeabilization cells were blocked for 1h  
183 using 2% bovine serum albumin (BSA) in PBST (PBS containing 0.05% tween 20; Sigma, P2287).  
184 Primary antibody against hKir 4.1 (1:100, Novus biologicals, NBP1-20149) was incubated  
185 overnight at 4°C in block solution. Cells were washed twice with PBST followed by 1h incubation  
186 at RT with anti-rabbit Alexa Fluor™ 488 (1:200; Thermo Fisher Scientific, A11001) and Alexa  
187 Fluor™ 568 phalloidin (1:200; Thermo Fisher Scientific, A12380). Following incubation cells were  
188 washed twice with PBST and incubated with DAPI (1:10000; Thermo Fisher Scientific, 62248) for  
189 10 min at RT. The cells were washed twice with PBS and mounted using Vectashield antifade  
190 mounting medium (H-1000: Vector labs). Optical z-sectioning at 0.2 μM intervals was done using  
191 Plan-Apochromat 63x/1.40 oil objective in Zeiss Axio Observer 7 with Apotome 2 feature and  
192 Axiocam 702 monochrome camera (Carl Zeiss, Germany). Signal-to-noise ratio was improved  
193 using in-built Zeiss deconvolution module and MIP projections of 2-3 Z-stacks are presented here.  
194 Representative images reported here are from three independent experiments. For quantitative  
195 measurements, deconvoluted Z-stacks were first blinded before analysis. 3D surface rendering  
196 plugin in Imaris software is used to reduce signal-noise ratio to measure Kir4.1 punctate  
197 distribution between cytoplasm and nucleus. The respective numbers were normalized against  
198 cytoplasmic space marked by F-actin and nuclear space by DAPI signals.

199  
200 LCLs suspension of all six participants were cleared by centrifugation (1500 rpm for 3 min) to  
201 remove culture media. RIPA lysis buffer containing phosphatase and protease inhibitor cocktails  
202 (EDTA- free, ab201120) was used to lyse the cells and total protein was isolated. Bradford assay

203 was used to measure the concentration of the protein. All six samples (20 ug protein /lane) were  
204 resolved using 10% SDS-PAGE, transferred to PVDF membrane and probed with anti-Kir4.1  
205 protein (NBP1-20149) and  $\beta$ -actin (A5441) as loading control. Target protein bands detection was  
206 done in Gel Documentation system (Syngene: chemiXX9) using Super signal West Pico  
207 Chemiluminescent substrate (Thermo Scientific, #34077) and densitometric quantitation assessed  
208 using Image Studio Lite v5.2 (LI-COR Biosciences).

209

## 210 **Results**

### 211 **Clinical features of a family with SeSAMESyndrome**

212 Six affected patients, born through two consanguineous unions, were identified from the relatives of  
213 an index patient (IV.2) who developed tonic-clonic seizures, ataxia and developmental delay (Fig.  
214 1a). The clinical features were broadly similar to SeSAME syndrome but without electrolyte  
215 imbalance (Table 1). The cerebellar symptoms (gait ataxia, intentional tremors and  
216 dysdiadochokinesia) were manifested from early childhood. The gait ataxia was progressive in  
217 nature, resulting in severe disability and later being confined to wheel chairs [IV. 2-5]. Dysmorphic  
218 facies, dysarthria, brisk deep tendon reflexes (DTRs), bilateral ankle clonus and an extensor  
219 Babinski response were evident in all of them. All the patients showed certain characteristic  
220 dysmorphic facial features like prominent supraorbital ridges, thick eyebrows, deep set eyes,  
221 epicanthal fold, low set ears, prominent antihelix, prominent nasal tip and thick lips (Fig. 1b).  
222 Behavioural abnormalities like stereotypies, hyperactivity, anger outbursts and psychotic symptoms  
223 were also observed (Table 1). They also had hearing impairment, and audiometry measures  
224 revealed bilateral mild to severe sensory neural hearing loss. Motor nerve conduction velocities  
225 from patients (V.1-2) were normal. The EEG from patients (V.1-2) showed generalised seizure

226 discharges before treatment (Fig. 1c), which became normal after treatment with anti-epileptic  
227 drugs. The other four members (IV.2-5) remained seizure free for several years on medication. MRI  
228 from IV.2 showed enlarged basal ganglia and cerebellar atrophy (Fig. 1d). The remaining members  
229 of the family were clinically unaffected.

230  
231 **Variant prioritization using ROH and non-ROH methods identified two novel variants in**  
232 ***KCNJ10* and *PI4KB* and revealed mutation burden in Chr 1 in all patients**

233 To identify the critical disease-associated loci, we performed WES and prioritized variants based on  
234 two independent approaches; assessing the exome-wide levels of homozygosity (ROH method) and  
235 assessing variants based on allele frequencies with autosomal recessive inheritance pattern (non-  
236 ROH method) in all family members. Unanimously, both analysis pipelines identified two novel  
237 high-risk disease-associated variants in *KCNJ10* and *PI4KB* and five rare variants in *PVRL4*,  
238 *RORC*, *FLG2*, *FCRL1*, and *NIT1* and one common variant in *HSPA6* segregating in homozygous  
239 state in all patients and heterozygous state in both parents. Surprisingly, both methods revealed  
240 mutational burden in Chr1 (Fig. 2a; Table 2).

241  
242 Deleterious genetic effects of inbreeding are evident in children born out of consanguineous unions  
243 with a relatively higher burden of homozygous alleles [34, 35, 36]. These effects have been  
244 implicated to influence the evolution of mental illness and neurodevelopmental disorders [34].  
245 Since SeSAME syndrome follows autosomal recessive (AR) inheritance and the role of  
246 homozygous alleles in AR illness has been well established [37], we analyzed the exome-wide  
247 levels of homozygosity for all samples within the pedigree including seven population controls (see  
248 materials and methods). Principal Component Analysis (PCA) of the exome-wide F-statistics

249 separates the family members (n=6) from the population controls (n=7), explaining for an overall  
250 variance of 49.6%. All samples (both familial and population) within the two clusters, fell within  
251 their 95% confidence ellipses, except for two controls representing the relatively admixed  
252 communities (Fig. 2b). The SeSAME family alone was subjected to PCA in which the cases (n=4)  
253 formed a cluster and the unaffected parents (n=2) fell outside the 95% confidence ellipse (Fig. 2c),  
254 explaining the intra-familial variance in homozygosity. The ROH within the exomes of the  
255 individuals in the pedigree and the population controls were identified. A total of 56 homozygous  
256 stretches (either overlapping or unique) were identified in all cases and controls, of which 44  
257 stretches belonged to the four affected siblings and the remaining were distributed between  
258 unaffected parents and population controls (Supplementary Table 1). Nevertheless, no ROH was  
259 detected in a subset of population controls. The burden of ROHs witnessed in the cases as  
260 compared to controls could be attributed to their consanguineous parentage. Of the ROHs identified  
261 in total, five stretches were explicitly shared between all the affected siblings but not observed in  
262 the unaffected parents and population controls, which will henceforth be notified as  $ROH_{affected}$  (Fig.  
263 2d). The  $ROH_{affected}$  consists of a union set of 5329 variants across all the cases and controls, of  
264 which any given variant was observed in at least one sample. Since the disorder follows an  
265 autosomal recessive (AR) inheritance pattern, of the 5329 variants, we identified those that were  
266 heterozygous (HET) in both unaffected parents, but homozygous (HOM) in all of the affected  
267 siblings. Seventy-eight such variants, belonging to 47 genes, were identified and all of them  
268 mapped to Chr 1 (Supplementary Table2). This skewed observation could not be attributed to the  
269 length of Chr 1 for three reasons: i) the method used to compute ROH uses a sliding window  
270 approach which essentially removes the bias induced by the length of the chromosome; ii) the same  
271 Chr 1 ROH was not observed in either of the controls; iii) no ROH was observed in Chr 2 despite

272 its genomic length being comparable to that of Chr 1. Of the 78 variants only three missense  
273 variants i.e., i) Chr1:158368964-C-T (*OR10T2*) ii) Chr1:160011455-T-C (*KCNJ10*) and iii)  
274 Chr1:161495040-C-T (*HSPA6*), were predicted to be deleterious by two algorithms.

275  
276 To identify other deleterious variants segregating within the family by AR pattern, which could  
277 have otherwise been ignored by the ROH based method, we identified all the exonic and splice  
278 variants (including non-synonymous, stop gain and stop loss). The common variants i.e., those with  
279 a minor allele frequency (MAF)>0.01 in 1KG\_all (1000 Genomes Project) and ExAC\_all (Exome  
280 Aggregation Consortium) databases, were excluded from the analysis. We identified seven variants  
281 belonging to seven genes (Supplementary Table3). Interestingly, all the seven variants were located  
282 within Chr1:151288779-161088292, which was a subset of ROH<sub>affected</sub> (Fig. 2d). Among the seven  
283 variants, Chr1:160011455-T-C [*KCNJ10*] was an obvious overlap. The remaining six variants fell  
284 on *PI4KB*, *RORC*, *FLG2*, *FCRL1*, *PVRL4* and *NITI* genes. Apart from *KCNJ10* variant, none were  
285 predicted to be deleterious by all six prediction algorithms. However, three of the remaining six  
286 variants (Chr1:151288779-T-C [*PI4KB*], Chr1:161049499-G-A [*PVRL4*] and Chr1:161088292-A-  
287 G [*NITI*]) were predicted to be deleterious by at least two algorithms (Table 2). Finally, the  
288 zygosity of the *KCNJ10* variant was confirmed by sanger sequencing for six patients and four  
289 unaffected parents in the family (III.11-12, IV.2-5, IV.9-10 and V.1-2) (Fig. 2e).

290  
291 Thus, of the union set of nine putative deleterious variants (three based on ROH method and seven  
292 based on allele frequencies) segregating within the family, the *KCNJ10* gene was shortlisted for  
293 functional analysis to unravel the molecular impact of the variant for following reasons: i) *KCNJ10*,  
294 the candidate gene known to cause SeSAME syndrome (Celmina et al., 2018); ii) the variant

295 reported in the patients is novel; iii) this was the only deleterious variant identified by both methods  
296 and iv) the variant reside at the interface between transmembrane and cytoplasmic domain at the  
297 membrane (Fig. 2f) which is strongly conserved through evolution (Fig. 2g).

298

### 299 **Novel *KCNJ10* variant disrupts channel properties in patient-derived LCLs**

300 LCLs have been routinely used as a surrogate *in vitro* cell model to investigate cellular mechanisms  
301 of neurodevelopmental psychiatric disorders [38]. To investigate the functional role of Kir4.1<sup>T290A</sup>,  
302 we generated patient-specific LCLs, validated by karyotype for six members of SeSAME family.  
303 All six LCLs are free from both numeric and structural chromosomal abnormalities (data not  
304 shown).

305

306 The barium-sensitive inwardly-rectifying K<sup>+</sup> current in LCLs measured by whole-cell patch clamp  
307 was substantially compromised in all patients. Kir4.1<sup>T290A</sup> significantly depolarized LCL  
308 membranes and showed deficits in clearance of extracellular K<sup>+</sup>. To determine whether LCLs  
309 express functionally active endogenous Kir4.1 protein, we used immunofluorescence (IF), western  
310 blot and electrophysiology (Fig. 3). In parental controls, Kir4.1 is in close proximity with the actin-  
311 rich plasma membrane, diffusely discernible in the cytoplasm and enriched in the nuclear  
312 membrane and nucleus (Fig. 3a). However, in all affected individuals, we observed an increased  
313 punctate distribution of Kir4.1 in the cytoplasm but with no apparent disparity in the nucleus and  
314 nuclear membrane (Fig. 3b). To confirm the IF findings, western blot analysis showed a substantial  
315 increase in the expression of Kir4.1 in all patients compared with unaffected parents (Fig. 3C and  
316 3D). These findings suggest an unstable nature of the mutant Kir4.1<sup>T290A</sup> in all patients.

317

318 To confirm whether the endogenous Kir4.1 expressed in LCLs is functionally active and elicit  
319 detectable inward-rectifying potassium currents *in vitro*, we performed whole-cell patch clamp  
320 recordings in response to voltage-steps from -120 to 40mV in 10mV, from a holding potential of -  
321 30mV both in the presence and absence of 110 $\mu$ M barium, a selective Kir channel blocker. Baseline  
322 current discharges from two heterozygous parental controls (III.11:  $-0.89 \pm 0.086$ ,  $n=18$ ,  $p=1.114$  and  
323 III.12:  $-0.86 \pm 0.049$ ,  $n=16$ ,  $p=1.347$ ) were not significantly different from wild type controls (-  
324  $0.85 \pm 0.046$ ,  $n=17$ ) (Fig. 3E). In contrast, the average barium-sensitive current densities were  
325 substantially decreased in all three control LCLs tested, in heterozygous parents (III.11: -  
326  $0.64 \pm 0.041$ ,  $n=15$ ,  $p=2.1E-4$  and III.12:  $-0.60 \pm 0.086$ ,  $n=14$ ,  $p=1.8E-4$ ) and wild type ( $-0.63 \pm 0.104$ ,  
327  $n=14$ ,  $p=2.5E-4$ ) compared with their respective baseline discharges, implying the specificity of K<sup>+</sup>  
328 currents recorded from endogenous Kir channels (Fig. 3E).

329  
330 We recorded the resting membrane potential of LCLs from patients (Fig. 3F). Average membranes  
331 voltages from all patients (IV.2:  $-30\text{mV} \pm 3.640$ ,  $n=18$ ,  $p=1.3E-5$ ; IV.3:  $-32\text{mV} \pm 2.156$ ,  $n=20$ ,  
332  $p=2.4E-5$ ; IV.4:  $-31\text{mV} \pm 3.083$ ,  $n=17$ ,  $p=1.7E-4$ ; IV.5:  $-24\text{mV} \pm 2.817$ ,  $n=20$ ,  $p=2.8E-5$ ) were  
333 significantly hyperpolarized as compared to wild type (WT:  $-55\text{mV} \pm 4.102$ ,  $n=24$ ) and parental  
334 controls (III.11:  $-51\text{mV} \pm 3.842$ ,  $n=21$  and III.12:  $-50\text{mV} \pm 4.21$ ,  $n=19$ ). In whole-cell voltage clamp,  
335 membrane current amplitudes were measured in all family members at both positive and negative  
336 potentials than the K<sup>+</sup> equilibrium potential ( $E_k$ ) (Fig. 3G and 3H). The mean current densities as a  
337 function of voltage (pA/pF) measured in all those expressing the mutant channel were markedly  
338 smaller than wild type and parental controls (Fig. 3H). One major facet of the Kir4.1 channel is to  
339 clear extracellular K<sup>+</sup> thereby showing stronger rectification. To test the K<sup>+</sup> clearance ability of  
340 LCLs, we clamped the cells at their resting membrane potential, with and without 110 $\mu$ M barium,



341 and measured the elicited membrane current discharges upon induced  $K^+$  steps (from 5-20 mM).  
342 Overall, barium-sensitive currents from all patients were significantly reduced when compared to  
343 both parental and wild type controls (Fig. 3I).

344

## 345 **Discussion**

346 In this study, we identified two novel pathogenic variants in *KCNJ10* and *PI4KB*, five rare  
347 pathogenic variants in *PVRL4*, *RORC*, *FLG2*, *FCRL1* and *NIT 1* and one common pathogenic  
348 variant in *HSPA6* suggesting the importance of membrane lipid signaling, adhesion-mediated cell  
349 migration and protein trafficking in SeSAME syndrome through regulation of Kir channel activity.  
350 In multiple biological contexts, these cellular processes are tightly linked in regulating Kir4.1  
351 channel function at the plasma membrane [9, 39, 40, 41, 42, 43]. Functional studies in patient-  
352 specific LCLs suggests that the variant in *KCNJ10* causes 60% reduction in Kir4.1 channel activity  
353 which is presumably due to altered protein localization and decreased surface expression of mutant  
354 proteins. Finally, our study identified risk-associated variants in seven new genes in SeSAME  
355 syndrome, which might act as modifiers by regulating Kir4.1 channel function. A detailed  
356 mechanistic study investigating the biology of these modifiers in Kir4.1 physiology will help us to  
357 underpin the biology of disease manifestation in SeSAME syndrome.

358

359 Signal-dependent Golgi export processes have been implicated in Andersen-Tawil syndrome  
360 (ATS1) by controlling the surface density Kir2.1 channel [44]. It has become evident in recent  
361 years, that differential trafficking of Kir channels controls neuronal excitability, hormone secretion,  
362 action potential,  $K^+$  homeostasis and salt balance. The shared Golgi export signal patch at the  
363 cytoplasmic region in Kir2.3 and Kir4.1 is an AP-1 clathrin adaptor recognition site which ensures

364 an additional quality control check point for the exit of mature folded channels [39]. The variant  
365 reported in this study Kir4.1<sup>T290A</sup>, reside in close proximity to Golgi export patch at the cytoplasmic  
366 region, implying the role of protein trafficking in SeSAME syndrome. Supporting this view, non-  
367 ROH method of analysis identified a pathogenic common variant in *HSPA6* gene, a molecular  
368 chaperone involved in ATP-dependent protein quality control system. It is also interesting to note  
369 the association of *HSPA6* variant in patients with sensory disturbances [45] suggesting mutations in  
370 genes that regulate protein trafficking can influence surface expression of Kir4.1 channel,  
371 irrespective of its variants.

372  
373 All six patients reported here displayed relatively uniform and expected neurological and  
374 psychiatric manifestations, but they did not manifest electrolyte imbalance. Therefore, how and  
375 why certain *KCNJ10* variants fail to manifest electrolyte imbalance in SeSAME syndrome needs to  
376 be explored. There could be two possibilities for this discrepancy. First, it's possible that certain  
377 *KCNJ10* mutations can affect CNS functions independently of other organ systems. It is  
378 conceivable that astrocytes and microglial cells of nervous system are highly sensitive to  
379 dysregulation of potassium homeostasis, while basolateral membrane in the distal nephron may be  
380 impervious to this effect [26]. Another possibility is that same *KCNJ10* variants could behave  
381 differently between CNS and kidney, since the channel activity depends largely on the formation of  
382 heterotetramers with other Kir entities (Kir5.1), cell type specificity, gating mechanisms and its  
383 influence on cell surface signaling receptors through PIP2 binding [9, 40, 43, 46]. In addition, it is  
384 unclear whether renal electrolyte deficit is a progressive impairment that develops over time, or a  
385 direct effect of the mutation, which necessitates further investigations and follow-up clinical  
386 evaluations. These different mechanisms suggest that although major gene effects are probably the

387 primary drivers of illness, the diversity in clinical presentation is perhaps an outcome of complex  
388 genetic interactions between common and rare variants, each of varying effect sizes.

389  
390 Surprisingly, both methods concluded a mutational and ROH burden in Chr 1. Given the clinical  
391 diversity and for additional reasons as discussed above, we suggest two possibilities for ROH and  
392 mutational burden which are broadly classified into intrinsic and extrinsic factors. Intrinsic factors  
393 include recombination hot-spots, defects in DNA repair, chromatin remodelling and yet  
394 unidentified intra-cellular signaling events, that favour to the occurrence of ROH, co-segregating  
395 with the illness. The extrinsic factor could be the clan structure of the family, which indicates a  
396 high-degree of endogamy. Another possibility is that individual ROHs might play key role in  
397 spatial-temporal regulation of gene expression within cell types that are sensitive to  $K^+$   
398 homeostasis. The difference in the expression of Kir4.1 in patients in our SeSAME pedigree also  
399 highlights the role of ROH in gene regulation. Therefore, it would be helpful to investigate the  
400 functional consequences of homozygosity in expression of genes within the ROH and/or in close  
401 proximity especially in cell types that are relevant to the pathophysiology of SeSAME syndrome.  
402 Finally, an interplay between these factors could help us discriminate the cause and effect  
403 relationship of ROH in clinical diversity of SeSAME syndrome. Usually for every pregnancy in  
404 autosomal recessive disorders, there is a probability of 0.25 that the offspring(s) will inherit two  
405 copies of the disease gene and will therefore exhibit the phenotype [47]. However, in a clinical  
406 setting this distribution is skewed more towards almost all affected individuals in the same  
407 generation, than one would rather expect by chance, especially in children born to consanguineous  
408 unions. Thus, this skewed observation needs to be addressed at holistic paradigms by developing

409 bio-physical and mathematical models to understand the physics and governing dynamics of the  
410 intra-cellular events, influencing the silent recombination choices of homologous chromosomes.

411  
412 Though our study identified novel and common variants in new genes and its pathways that could  
413 help modify the activity of Kir channels in SeSAME pathogenesis, a complete mechanistic  
414 understanding would require establishment of animal models to explore the cell-type specific role  
415 of Kir4.1 in brain function. Justifying the importance of K<sup>+</sup> homeostasis in brain, Kir4.1 knockout  
416 mouse, *Xenopus*, *zebrafish* and *Drosophila* mimics a subset of SeSAME symptoms in humans [6, 7,  
417 10, 26, 29, 48, 49]. Therefore, future experiments with *in vivo* model systems will help dissect the  
418 cross talk of Kir4.1 signaling with membrane lipids [50], cell adhesion in axon guidance and  
419 synaptic architecture which is an essential feature for proper synaptic transmission and plasticity.

420  
421 Our study identified two novel and five rare variants in genes that potentially modifies the channel  
422 properties of Kir4.1-mediated pathogenesis in SeSAME syndrome. In future, genetic interaction  
423 experiments in cell and/or animal model systems will help us tease apart the causative effects of  
424 these novel modifiers in Kir4.1 biology.

425

## 426 **Acknowledgement**

427 The authors are immensely grateful to all members of SeSAME family for their participation and  
428 constant involvement in this study. We thank Dr. Gautham Arunachal U (NIMHANS) for  
429 describing the various dysmorphic features of the SeSAME kindreds. We thank ADBS genomic  
430 team for sharing the WES analysis pipeline. This work was generously supported with funds from  
431 Ramalingaswami re-entry fellowship (RLF/DBT/2015), ADBS (BT/PR17316/MED/31/326/2015)

432 from Department of Biotechnology and Department of Science and Technology  
433 (ECR/2015/000468). Finally, the authors are thankful to all members of the molecular genetics,  
434 ADBS lab and the ADBS consortium for suggestions and discussions during the course of  
435 investigation.

436

#### 437 **Funding**

438 These experiments were supported by Ramalingaswami re-entry fellowship (RLF/DBT/2015) and  
439 ADBS (BT/PR17316/MED/31/326/2015) from Department of Biotechnology; Early career grant  
440 (ECR/2015/000468) from Department of Science and Technology.

441

#### 442 **Competing interests**

443 The authors declare no competing or financial interests.

444

#### 445 **References**

- 446 1 Klassen T, Davis C, Goldman A, Burgess D, Chen T, Wheeler D, McPherson J, Bourquin T, Lewis L,  
447 Villasana D, Morgan M, Muzny D, Gibbs R, Noebels. Exome sequencing of ion channel genes reveals  
448 complex profiles confounding personal risk assessment in epilepsy. *J.Cell.* 2011 Jun 24;145(7):1036-  
449 48.
- 450 2 Imbrici P, Camerino DC, Tricarico D. 2013. Major channels involved in neuropsychiatric disorders  
451 and therapeutic perspectives. *Front Genet.* 2013 May 7;4:76.
- 452 3 Begum R, Bakiri Y, Volynski KE, Kullmann DM. Action potential broadening in a presynaptic  
453 channelopathy. *Nat Commun.* 2016 Jul 6;7:12102.
- 454 4 Noebels J. Precision physiology and rescue of brain ion channel disorders. *J Gen Physiol.* 2017 May  
455 1;149(5):533-546.

- 456 5 Middleton SJ, Kneller EM, Chen S, Ogiwara I, Montal M, Yamakawa K, McHugh TJ. Altered  
457 hippocampal replay is associated with memory impairment in mice heterozygous for the *Scn2a* gene.  
458 *Nat Neurosci.* 2018 Jul;21(7):996-1003.
- 459 6 Schirmer L, Möbius W, Zhao C, et al. Oligodendrocyte-encoded Kir4.1 function is required for axonal  
460 integrity. *Elife.* 2018;7:e36428.
- 461 7 Larson VA, Mironova Y, Vanderpool KG, Waisman A, Rash JE, Agarwal A, Bergles DE.  
462 Oligodendrocytes control potassium accumulation in white matter and seizure susceptibility. *eLife.*  
463 2018;7:e34829.
- 464 8 Ye M, Yang J, Tian C, Zhu Q, Yin L, Jiang S, Yang M, Shu Y. Differential roles of NaV1.2 and  
465 NaV1.6 in regulating neuronal excitability at febrile temperature and distinct contributions to febrile  
466 seizures. *Sci Rep.* 2018 Jan 15;8(1):753.
- 467 9 deHart GW, Jin T, McCloskey DE, Pegg AE, Sheppard D. The  $\alpha 9\beta 1$  integrin enhances cell  
468 migration by polyamine-mediated modulation of an inward-rectifier potassium channel. *Proc Natl*  
469 *Acad Sci U S A.* 2008;105(20):7188-93.
- 470 10 Kelley KW, Ben Haim L, Schirmer L, et al. Kir4.1-Dependent Astrocyte-Fast Motor Neuron  
471 Interactions Are Required for Peak Strength. *Neuron.* 2018;98(2):306-319.e7.
- 472 11 Lupski JR, Belmont JW, Boerwinkle E, Gibbs RA. Clan genomics and the complex architecture of  
473 human disease. *Cell.* 2011 Sep 30;147(1):32-43.
- 474 12 Bockenbauer, D., Feather, S., Stanescu, H. C., Bandulik, S., Zdebik, A. A., Reichold, M., et al.  
475 Epilepsy, ataxia, sensorineural deafness, tubulopathy, and *KCNJ10* mutations. *N. Engl. J. Med.* 2009;  
476 360: 1960-1970.
- 477 13 Scholl UI, Choi M, Liu T, et al. Seizures, sensorineural deafness, ataxia, mental retardation, and  
478 electrolyte imbalance (SeSAME syndrome) caused by mutations in *KCNJ10*. *Proc Natl Acad Sci U S*  
479 *A.* 2009;106(14):5842-7.

- 480 14 Celmina M, Micule I, Inashkina I, Audere M, Kuske S, Pereca J, Stavusis J, Pelnena D, Strautmanis J.  
481 EAST/SeSAME syndrome: Review of the literature and introduction of four new Latvian patients.  
482 Clin Genet. 2018 May 3.
- 483 15 Heuser K, Nagelhus EA, Taubøll E, Indahl U, Berg PR, Lien S, Nakken S, Gjerstad L, Ottersen OP.  
484 Variants of the genes encoding AQP4 and Kir4.1 are associated with subgroups of patients with  
485 temporal lobe epilepsy. Epilepsy Research 2010; 88:55-64.
- 486 16 Sicca F, Imbrici P, D'Adamo MC, Moro F, Bonatti F, Brovedani P, et al. Autism with seizures and  
487 intellectual disability: possible causative role of gain-of-function of the inwardly-rectifying K<sup>+</sup>  
488 channel Kir4.1. Neurobiology of Disease 2011; 43:239-247.
- 489 17 Sicca F, Ambrosini E, Marchese M, Sforna L, Servettini I, Valvo G, et al. Gain-of-function defects of  
490 astrocytic Kir4.1 channel in children with autism spectrum disorders and epilepsy. Scientific Reports  
491 2016; 6:34325.
- 492 18 Tong X, Ao Y, Faas GC, Nwaobi SE, Xu J, Hausteind MD, et al. Astrocyte Kir4.1 ion channel deficit  
493 contributes to neuronal dysfunction in Huntington's disease model mice. Nat. Neurosci. 2014; 17, 694-  
494 703.
- 495 19 Gu C. KIR4.1: K<sup>+</sup> Channel Illusion or Reality in the Autoimmune Pathogenesis of Multiple Sclerosis.  
496 Front Mol Neurosci. 2016;9:90.
- 497 20 Kahanovitch U, Cuddapah VA, Pacheco NL, Holt LM, Mulkey DK, Percy AK, Olsen ML. MeCP2  
498 Deficiency Leads to Loss of Glial Kir4.1. eNeuro. 2018; 19; 5(1). 0194-17.
- 499 21 Martin HC, Jones WD, McIntyre R, Sanchez-Andrade G, Sanderson M, Stephenson JD et al. A SINE  
500 Insertion in ATP1B2 in Belgian Shepherd Dogs Affected by Spongy Degeneration with Cerebellar  
501 Ataxia (SDCA2). G3 (Bethesda). 2017;7(8):2729-2737.
- 502 22 Van Poucke M, Stee K, Bhatti SF, et al. The novel homozygous KCNJ10 c.986T>C (p.(Leu329Pro))  
503 variant is pathogenic for the SeSAME/EAST homologue in Malinois dogs. Eur J Hum Genet. 2016;  
504 25(2):222-226.

- 505 23 Lopatin AN, Makhina EN, Nichols CG. Potassium channel block by cytoplasmic polyamines as the  
506 mechanism of intrinsic rectification. *Nature* 1994; 24:372(6504):366-9.
- 507 24 Paulais M, et al. Renal phenotype in mice lacking the Kir5.1 (Kcnj16) K<sup>+</sup> channel subunit contrasts  
508 with that observed in SeSAME/EAST syndrome. *Proc Natl Acad Sci USA*. 2011;108(25):10361-  
509 10366.
- 510 25 Kofuji P, Ceelen P, Zahs KR, Surbeck LW, Lester HA, Newman EA. Genetic inactivation of an  
511 inwardly rectifying potassium channel (Kir4.1 subunit) in mice: phenotypic impact in retina. *J*  
512 *Neurosci*. 2000;20:5733-5740.
- 513 26 Djukic B, Casper KB, Philpot BD, Chin LS, McCarthy KD. Conditional knock-out of Kir4.1 lead to  
514 glial membrane depolarization, inhibition of potassium and glutamate uptake, and enhanced short-term  
515 synaptic potentiation. *J Neurosci*. 2007;27:11354-11365.
- 516 27 Neusch C., Papadopoulos N., Muller M. et al. Lack of the Kir4.1 channel subunit abolishes  
517 K<sup>+</sup>buffering properties of astrocytes in the ventral respiratory group: impact on extracellular K<sup>+</sup>  
518 regulation. *J. Neurophysiol*. 2006; 95, 1843-1852.
- 519 28 Song F, Hong X, Cao J, et al. Kir4.1 channel in NG2-glia play a role in development, potassium  
520 signaling, and ischemia-related myelin loss. *Commun Biol*. 2018;1:80.
- 521 29 Neusch C., Rozengurt N., Jacobs R. E., Lester H. A. and Kofuji P. Kir4.1 potassium channel subunit is  
522 crucial for oligodendrocyte development and in vivo myelination. *J. Neurosci*. 2001; 21, 5429-5438
- 523 30 Hui-Yuen J, McAllister S, Koganti S, Hill E, Bhaduri-McIntosh S. Establishment of Epstein-Barr  
524 virus growth-transformed lymphoblastoid cell lines. *Journal of visualized experiments: JoVE*.  
525 2011(57).
- 526 31 Suhas G, Husayn Ahmed P, Ravi Kumar Nadella, Ravi Prabhakar More, Manasa Seshadri, Biju  
527 Viswanath, Mahendra Rao, Sanjeev Jain, The ADBS consortium, Odity Mukherjee. Exome  
528 sequencing in families with severe mental illness identifies novel and rare variants in genes implicated  
529 in Mendelian neuropsychiatric syndromes. *Psychiatry and Clinical Neurosciences* 2018.



- 530 32 Ahmed P, Vidhya V, et al. INDEX-db: The Indian Exome Reference database (Phase-I). biorxiv.  
531 2018.doi: <https://doi.org/10.1101/312090>
- 532 33 Purcell S, Neale B, Todd-Brown K, et al. PLINK: a tool set for whole-genome association and  
533 population-based linkage analyses. *Am J Hum Genet.* 2007;81(3):559-75.
- 534 34 Bittles AH, Black ML. Evolution in health and medicine Sackler colloquium: Consanguinity, human  
535 evolution, and complex diseases. *Proc Natl Acad Sci U S A.* 2010; 26:107.
- 536 35 Shawky RM, Elsayed SM, Zaki ME, et al. Consanguinity and its relevant to clinical genetics.  
537 *Egyptian Journal of Medical Human Genetics.* 2013;14:157-64.
- 538 36 Corry PC. Consanguinity and prevalence patterns of inherited disease in the UK Pakistani community.  
539 *Hum Hered.* 2014; 77(1-4): 207-16.
- 540 37 Sund KL, Zimmerman SL, Thomas C, Mitchell AL, Prada CE, Grote L, Bao L, Martin LJ, Smolarek  
541 TA. Regions of homozygosity identified by SNP microarray analysis aid in the diagnosis of autosomal  
542 recessive disease and incidentally detect parental blood relationships. *Genet Med.* 2013; 15(1):70-8.
- 543 38 Kumar S, Curran JE, Glahn DC, Blangero J. Utility of Lymphoblastoid Cell Lines for Induced  
544 Pluripotent Stem Cell Generation. *Stem Cells Int.* 2016; 2349261.
- 545 39 Li X, Ortega B, Kim B, Welling PA. A Common Signal Patch Drives AP-1 Protein-dependent Golgi  
546 Export of Inwardly Rectifying Potassium Channels. *J Biol Chem.* 2016 Jul 15;291(29):14963-72.
- 547 40 Hansen SB, Tao X, MacKinnon R. Structural basis of PIP2 activation of the classical inward rectifier  
548 K<sup>+</sup> channel Kir2.2. *Nature.* 2011 Aug 28;477(7365):495-8.
- 549 41 Ma D, Taneja TK, Hagen BM, Kim BY, Ortega B, Lederer WJ, Welling PA. Golgi export of the  
550 Kir2.1 channel is driven by a trafficking signal located within its tertiary structure. *Cell.* 2011 Jun  
551 24;145(7):1102-15.
- 552 42 Du X, Zhang H, Lopes C, Mirshahi T, Rohacs T, Logothetis DE. Characteristic interactions with  
553 phosphatidylinositol 4,5-bisphosphate determine regulation of kir channels by diverse modulators. *J*  
554 *Biol Chem.* 2004 Sep 3;279(36):37271-81.

- 555 43 Lopes CM, Zhang H, Rohacs T, Jin T, Yang J, Logothetis DE. Alterations in conserved Kir channel-  
556 PIP2 interactions underlie channelopathies. *Neuron*. 2002 Jun 13;34(6):933-44.
- 557 44 Plaster, N.M., Tawil, R., Tristani-Firouzi, M., Canu' n, S., Bendahhou, S.,Tsunoda, A., Donaldson,  
558 M.R., Iannaccone, S.T., Brunt, E., Barohn, R., et al. (2001). Mutations in Kir2.1 cause the  
559 developmental and episodic electrical phenotypes of Andersen's syndrome. *Cell* 105, 511-519.
- 560 45 Kobayashi D, Nishizawa D, Takasaki Y, et al. Genome-wide association study of sensory disturbances  
561 in the inferior alveolar nerve after bilateral sagittal split ramus osteotomy. *Mol Pain*. 2013;9:34.
- 562 46 Reichold M, Zdebik AA, Lieberer E, et al. KCNJ10 gene mutations causing EAST syndrome  
563 (epilepsy, ataxia, sensorineural deafness, and tubulopathy) disrupt channel function. *Proc Natl Acad  
564 Sci U S A*. 2010;107(32):14490-5.
- 565 47 Ellard S, Kivuva E, Turnpenny P, et al. An exome sequencing strategy to diagnose lethal autosomal  
566 recessive disorders. *Eur J Hum Genet*. 2014;23(3):401-4.
- 567 48 Chen R, Swale DR. Inwardly Rectifying Potassium (Kir) Channels Represent a Critical Ion  
568 Conductance Pathway in the Nervous Systems of Insects. *Sci Rep*. 2018;8(1):1617.
- 569 49 Dahal GR, Pradhan SJ, Bates EA. Inwardly rectifying potassium channels influence *Drosophila* wing  
570 morphogenesis by regulating Dpp release. *Development*. 2017 Aug 1;144(15):2771-2783.
- 571 50 Hardie, R. C., Gu, Y., Martin, F., Sweeney, S. T. and Raghu, P. (2004). In vivo light induced and basal  
572 phospholipase C activity in *Drosophila* photoreceptors measured with genetically targeted  
573 phosphatidylinositol 4,5-bisphosphatesensitive ion channels (Kir2.1). *J. Biol. Chem.* 279, 47773-  
574 47782.
- 575 51 Ahmad F, Nasir A, Thiele H, Umair M, Borck G, Ahmad W. A novel homozygous missense variant in  
576 NECTIN4 (PVRL4) causing ectodermal dysplasia cutaneous syndactyly syndrome. *Ann Hum Genet*.  
577 2018 Jul;82(4):232-238
- 578 52 Okada, S., Markle, J. G., Deenick, E. K., Mele, F., Averbuch, D., Lagos, M., Alzahrani, M et  
579 al Impairment of immunity to *Candida* and *Mycobacterium* in humans with bi-allelic RORC  
580 mutations. *Science* 349: 606-613, 2015.

581

582

583

584 **Figure legends**

585 **Figure 1. Clinical diagnosis of SeSAME family members.**

586 (A) Genogram of family with SeSAME syndrome with no electrolyte imbalance. The generations  
587 are marked in roman letters (I to V) and individuals in each generation are given running numbers.  
588 (B) All affected siblings showed dysmorphic facial features. (C) T2W image of IV.2 showing  
589 enlarged and bilateral basal ganglia (blue arrows) (D) T1 MPRAGE of IV.2 showing bilateral  
590 cerebellar atrophy (orange arrows) (E) EEG of V.1 showing generalized sharp and slow wave  
591 discharges predominantly in Fronto Central region (F) EEG of V.2 showing generalized poly spike  
592 discharges predominantly in Fronto -Temporal region.

593  
594 **Figure 2. Identification of novel mutation in *KCNJ10* by homozygosity mapping and whole**  
595 **exome analysis of SeSAME family members.**

596 (A) WES analysis pipeline and variant prioritization methods. (B) Principle component analysis  
597 (PCA) of exome-wide F-statistics explains for an overall variance of ~49% (PC1) between the  
598 SeSAME family members (purple ellipse) and healthy population controls (blue ellipse). The dot-  
599 dash lines in the plot represents the 95% confidence ellipse. (C) PCA plot explaining intra-familial  
600 levels of homozygosity between affected and un-affected members. (D) ROH regions observed in  
601 all patients but not in parental controls. (E) The zygosity of the *KCNJ10*<sup>T290A</sup> variant was validated  
602 in all the six affected (HOM) and the four unaffected individuals (HET) within the pedigree. (F) A  
603 schematic reconstruction of Kir4.1 with the T290A variant (purple) mapped in the cytoplasmic C-  
604 terminal domain, along with other deleterious variants identified from previous studies. (G)  
605 Multiple sequence alignment (MSA) of the Kir4.1 protein sequence across species reveals the  
606 evolutionary conservation of T290A in VEST domain.

607

608 **Figure 3. Novel Kir4.1<sup>T290A</sup> mutation affects channel localization and function in patient-**

609 **derived LCLs**

610 (A) Projected Z-stacks of six LCLs showing the distribution of Kir4.1 in green, phalloidin to label

611 F-actin in red and DAPI to label nucleus in blue. Scale bar, 10 $\mu$ m. (B) Quantitative measurement of

612 cytoplasmic and nuclear punctae normalized against the cytoplasmic space (as measured by F-actin

613 distribution) and nuclear space (as measured by DAPI distribution) in Z-stacks. (C) Anti-hKir4.1

614 western of six LCLs showing the distribution of both monomeric and multimeric forms of the

615 protein. Arrow indicates the expression of Kir4.1 protein against beta-actin loading control (blot

616 insert at the bottom). +/- and -/- indicates the nature of zygosity of unaffected parents and affected

617 individuals. (D) Densitometric plots representing the relative expression Kir4.1 protein from three

618 independent western experiments is represented as mean $\pm$ SE. Data analyzed using ANOVA. (E)

619 Whole-cell currents measured from healthy wild type controls and two unaffected parental controls

620 in response to voltage step protocol from -120 to 40mV in presence and absence of 110 $\mu$ M barium.

621 Cells were clamped at  $V_m$ , equal to resting  $V_m$  ( $V_h=V_m$ ). Histogram shows the subtraction of

622 currents obtained with barium from whole-cell currents, which served as internal control for each

623 experiment. Barium sensitive current shows the contribution of Kir channels to whole-cell currents

624 in each LCLs. Data analysed by  $k$  independent Kruskal-Wallis test with Bonferroni correction and

625 represented as  $\pm$ S.E. (F) Average membrane potential of LCLs from healthy control (wild type),

626 two unaffected parents (III.11 and III. 12) and four affected (IV.2 to IV.4). Data analyzed using  $k$

627 independent group one-way ANOVA test with Turkey-Kramer post hoc tests. (G) whole-cell patch

628 clamp recordings in response to voltage-steps from -120 to 40mV in 10mV steps, from a holding

629 potential of -30mV. Representative currents traces from respective LCLs. (H) Current-voltage

630 relationship is summarized within -120 to 40mV range. (I) Summary of inward currents discharges  
631 measured in response to induced K<sup>+</sup> steps from 5-20 mM extracellular K<sup>+</sup>. For improved Kir  
632 specificity, Kir current discharges measured with and without barium. Data analysed using *k*  
633 independent group one-way ANOVA test with Turkey-Kramer post hoc tests. Error bars represent  
634  $\pm$ S.E.                                   \*\*                                   represents                                   

*p*<0.001



**A** I

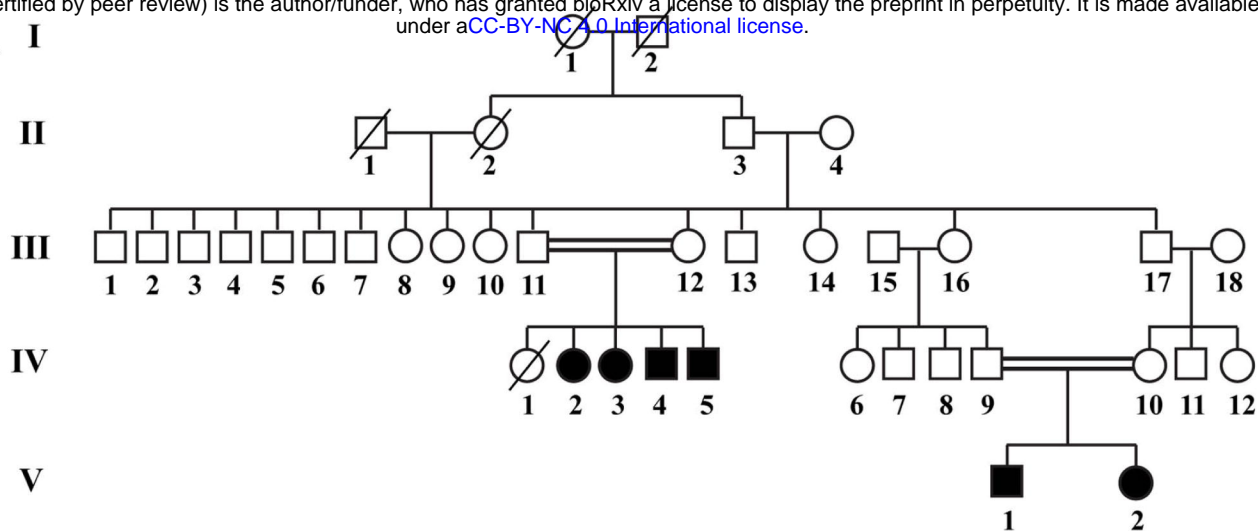

IV.2

IV.3

IV.4

IV.5

**B**

**C**

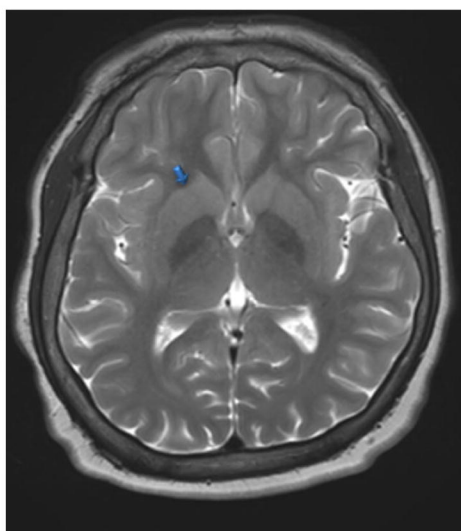

**D**

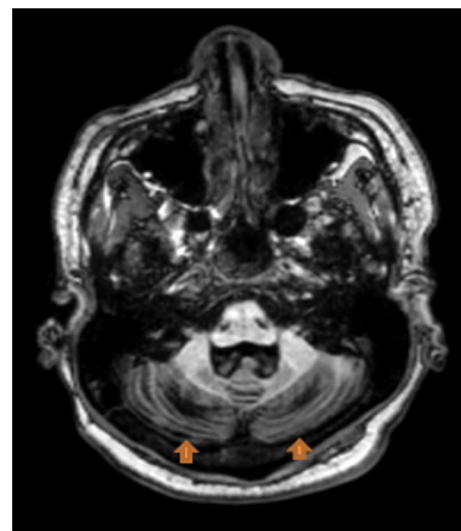

**E**

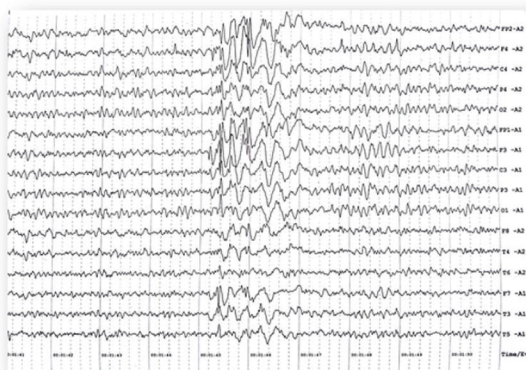

**F**

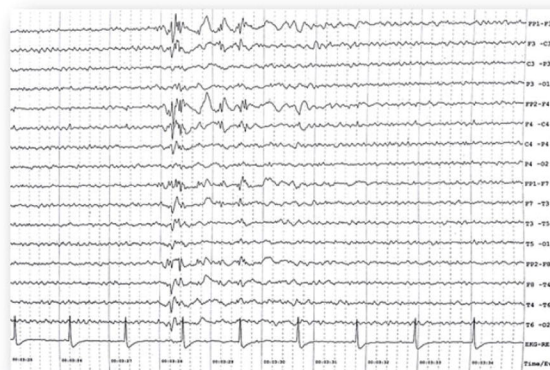



**A**

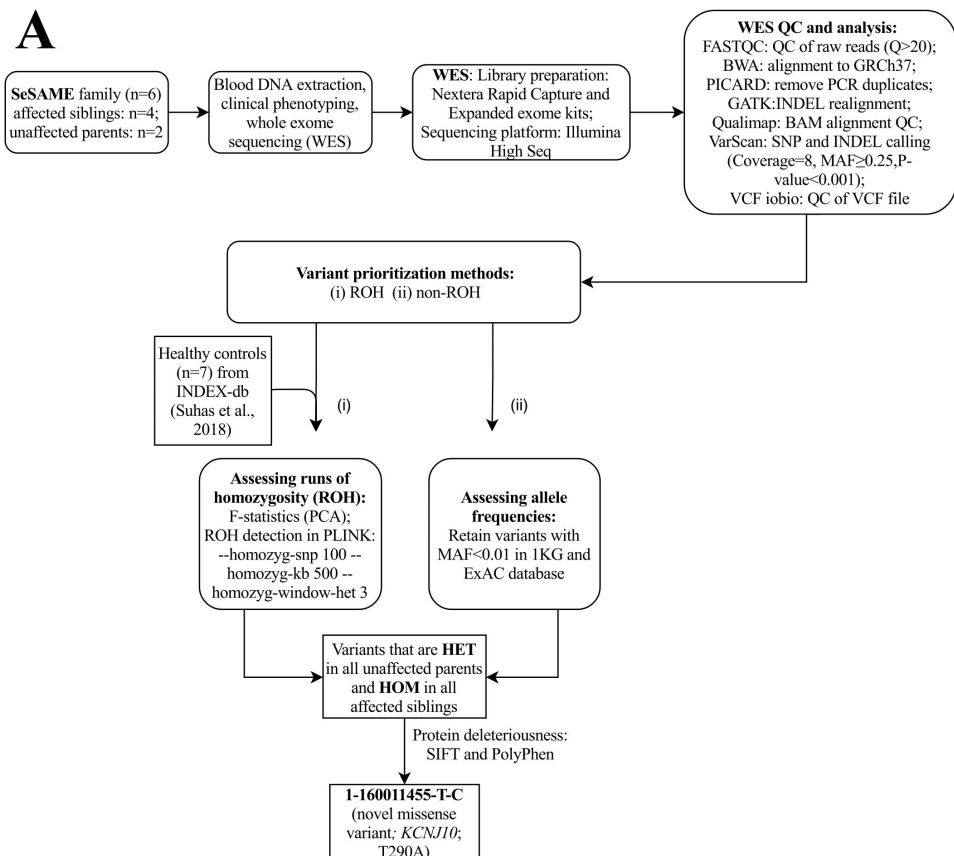

**D**

| Chr | Start     | End       |
|-----|-----------|-----------|
| 1   | 149726239 | 152185823 |
| 1   | 152883608 | 161561287 |
| 12  | 115109694 | 125324197 |
| 5   | 137206560 | 143131673 |
| 8   | 15398151  | 31024638  |

**E**

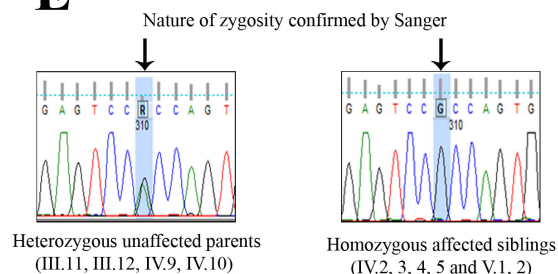

**B**

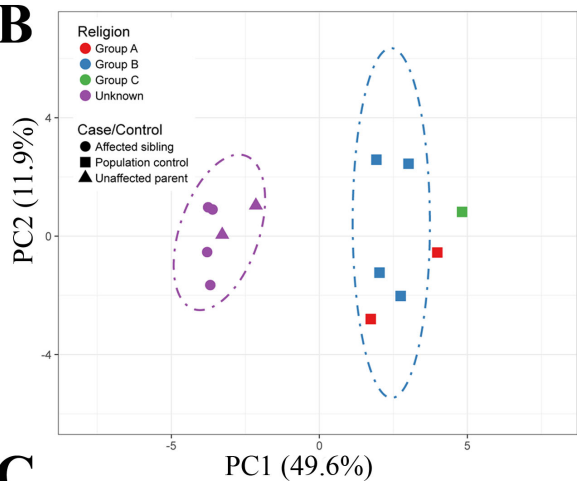

**C**

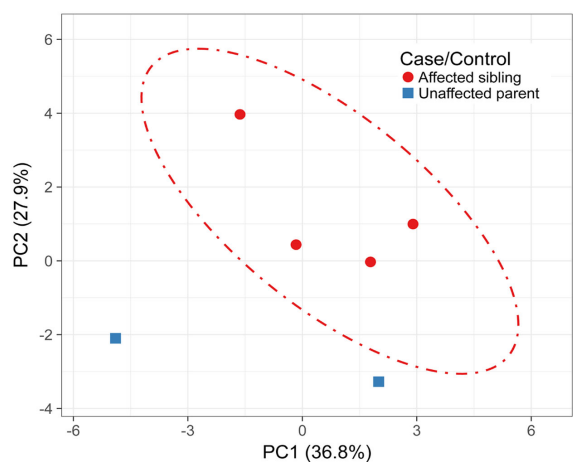

**F**

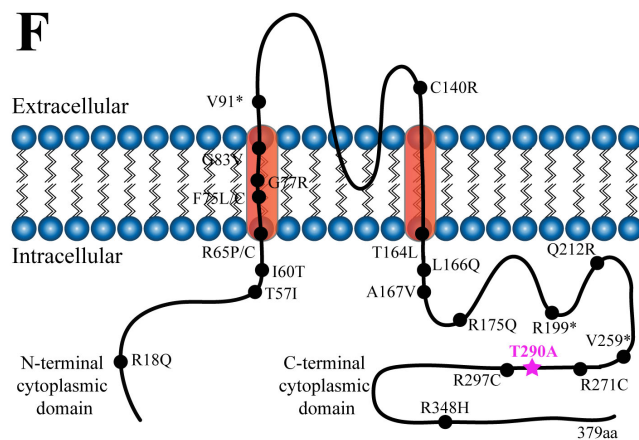

**G**

Human PLRSG-EGD**FE**LVIL**SGT**VEST**S**SATCQV  
 Chimp PLRSG-EGD**FE**LVIL**SGT**VEST**S**SATCQV  
 Mouse PLRSG-EGD**FE**LVIL**SGT**VEST**S**SATCQV  
 Cat PLRSG-EGD**FE**LVIL**SGT**VEST**S**SATCQV  
 Dme1 NATDMLQDK**FE**LV**IL**GT**VEST**GGQSTQA

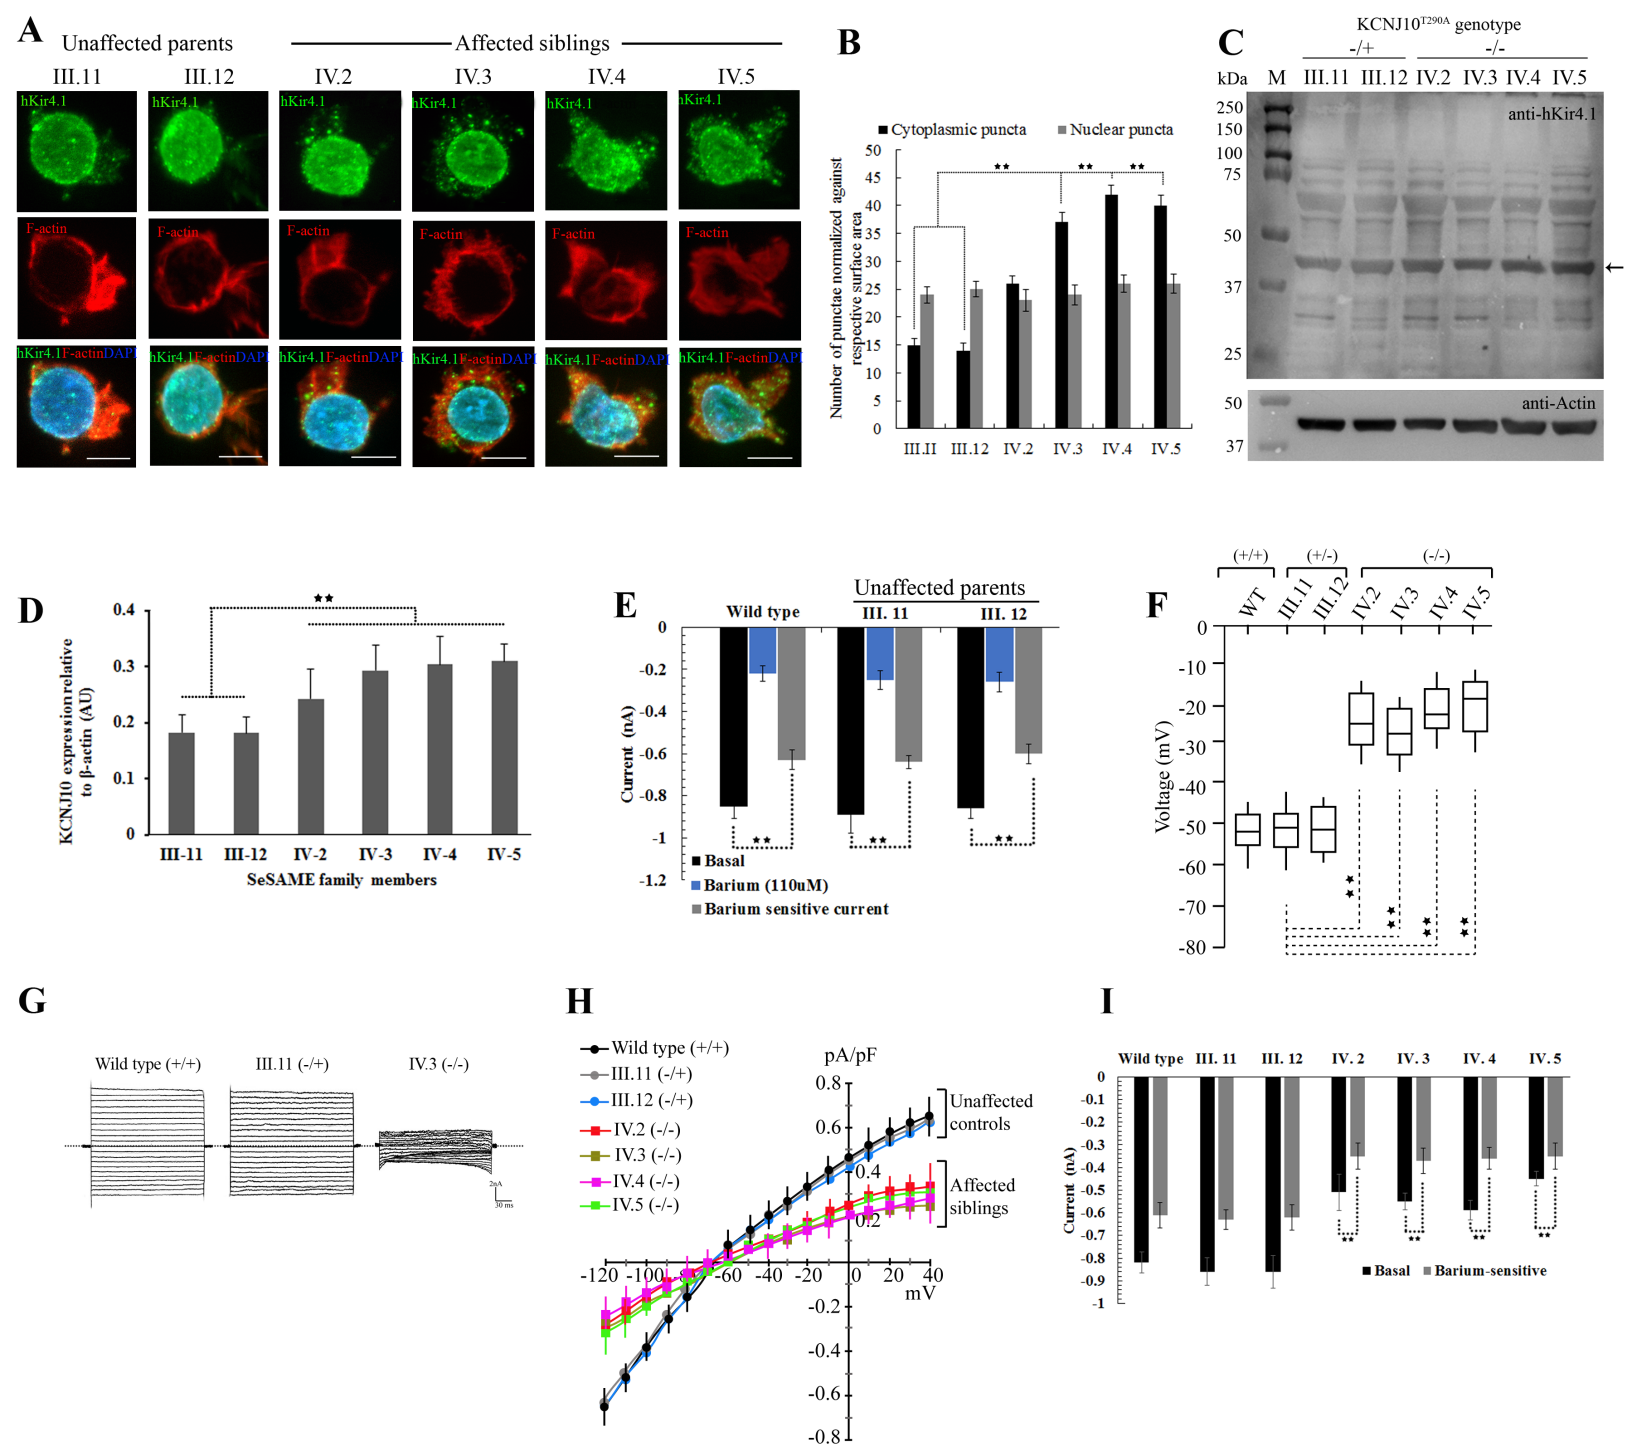

Source: https://www.biorxiv.org/content/biorxiv/early/2019/02/22/506949.full.pdf
